# Supplementary material for: Characterization of T-Circles and Their Formation Reveal Similarities to Agrobacterium T-DNA Integration Patterns
Source: PubMed Central journal article supplement (PMC9121065; doi:10.3389/fpls.2022.849930), 2022-05-06
Supplement: Table_1.pdf [file Table_1.pdf]

Supplemental Table 1. T-circles isolated in the initial experiments

| No.                                 | Sample No. | Strain | Construct | Monomeric/Complex* |
|-------------------------------------|------------|--------|-----------|--------------------|
| <i>N. benthamiana</i> with TET-ORI: |            |        |           |                    |
| 1                                   | #001-1     | EHA105 | TET-ORI   | complex            |
| 2                                   | #001-2     | EHA105 | TET-ORI   | monomeric          |
| 3                                   | #001-4     | EHA105 | TET-ORI   | monomeric          |
| 4                                   | #001-5     | EHA105 | TET-ORI   | monomeric          |
| 5                                   | #001-6     | EHA105 | TET-ORI   | monomeric          |
| 6                                   | #002-19    | EHA105 | TET-ORI   | monomeric          |
| 7                                   | #002-20    | EHA105 | TET-ORI   | complex            |
| 8                                   | #002-21    | EHA105 | TET-ORI   | complex            |
| 9                                   | #002-22    | EHA105 | TET-ORI   | monomeric          |
| 10                                  | #002-23    | EHA105 | TET-ORI   | complex            |
| 11                                  | #002-25    | EHA105 | TET-ORI   | monomeric          |
| 12                                  | #002-26    | EHA105 | TET-ORI   | monomeric          |
| 13                                  | #003-50    | EHA105 | TET-ORI   | complex            |
| 14                                  | #003-51    | EHA105 | TET-ORI   | complex            |
| 15                                  | #003-52    | EHA105 | TET-ORI   | monomeric          |
| 16                                  | #003-53    | EHA105 | TET-ORI   | monomeric          |
| 17                                  | #003-54    | EHA105 | TET-ORI   | complex            |
| 18                                  | #003-55    | EHA105 | TET-ORI   | monomeric          |
| 19                                  | #003-56    | EHA105 | TET-ORI   | monomeric          |
| 20                                  | #003-57    | EHA105 | TET-ORI   | monomeric          |
| 21                                  | #003-58    | EHA105 | TET-ORI   | monomeric          |
| 22                                  | #003-59    | EHA105 | TET-ORI   | monomeric          |
| 23                                  | #003-60    | EHA105 | TET-ORI   | complex            |
| 24                                  | #003-61    | EHA105 | TET-ORI   | complex            |
| 25                                  | #003-62    | EHA105 | TET-ORI   | complex            |
| 26                                  | #003-63    | EHA105 | TET-ORI   | monomeric          |
| 27                                  | #003-64    | EHA105 | TET-ORI   | complex            |
| 28                                  | #003-65    | EHA105 | TET-ORI   | monomeric          |
| 29                                  | #003-66    | EHA105 | TET-ORI   | monomeric          |
| 30                                  | #003-67    | EHA105 | TET-ORI   | monomeric          |
| 31                                  | #003-68    | EHA105 | TET-ORI   | complex            |
| 32                                  | #003-69    | EHA105 | TET-ORI   | monomeric          |
| 33                                  | #003-70    | EHA105 | TET-ORI   | monomeric          |
| 34                                  | #008-49    | EHA105 | TET-ORI   | complex            |
| 35                                  | #008-50    | EHA105 | TET-ORI   | complex            |
| 36                                  | #008-51    | EHA105 | TET-ORI   | complex            |
| 37                                  | #008-52    | EHA105 | TET-ORI   | monomeric          |
| 38                                  | #008-53    | EHA105 | TET-ORI   | complex            |
| 39                                  | #008-54    | EHA105 | TET-ORI   | monomeric          |
| 40                                  | #008-55    | EHA105 | TET-ORI   | monomeric          |
| 41                                  | #008-57    | EHA105 | TET-ORI   | monomeric          |
| 42                                  | #008-58    | EHA105 | TET-ORI   | monomeric          |
| 43                                  | #008-59    | EHA105 | TET-ORI   | monomeric          |
| 44                                  | #008-60    | EHA105 | TET-ORI   | complex            |
| 45                                  | #008-61    | EHA105 | TET-ORI   | complex            |

|    |         |        |         |           |
|----|---------|--------|---------|-----------|
| 46 | #008-62 | EHA105 | TET-ORI | complex   |
| 47 | #008-63 | EHA105 | TET-ORI | complex   |
| 48 | #008-64 | EHA105 | TET-ORI | monomeric |
| 49 | #008-65 | EHA105 | TET-ORI | monomeric |
| 50 | #008-66 | EHA105 | TET-ORI | complex   |
| 51 | #008-67 | EHA105 | TET-ORI | monomeric |
| 52 | #008-68 | EHA105 | TET-ORI | monomeric |
| 53 | #008-69 | EHA105 | TET-ORI | monomeric |
| 54 | #008-70 | EHA105 | TET-ORI | monomeric |
| 55 | #008-71 | EHA105 | TET-ORI | monomeric |
| 56 | #008-72 | EHA105 | TET-ORI | monomeric |
| 57 | #008-73 | EHA105 | TET-ORI | complex   |
| 58 | #008-74 | EHA105 | TET-ORI | monomeric |
| 59 | #008-75 | EHA105 | TET-ORI | monomeric |
| 60 | #008-76 | EHA105 | TET-ORI | complex   |
| 61 | #008-77 | EHA105 | TET-ORI | complex   |
| 62 | #008-78 | EHA105 | TET-ORI | monomeric |
| 63 | #008-79 | EHA105 | TET-ORI | complex   |
| 64 | #008-80 | EHA105 | TET-ORI | complex   |
| 65 | #008-81 | EHA105 | TET-ORI | monomeric |
| 66 | #008-82 | EHA105 | TET-ORI | monomeric |
| 67 | #008-83 | EHA105 | TET-ORI | complex   |
| 68 | #008-84 | EHA105 | TET-ORI | complex   |
| 69 | #008-85 | EHA105 | TET-ORI | complex   |
| 70 | #008-86 | EHA105 | TET-ORI | complex   |
| 71 | #008-87 | EHA105 | TET-ORI | monomeric |
| 72 | #008-88 | EHA105 | TET-ORI | complex   |
| 73 | #008-89 | EHA105 | TET-ORI | monomeric |
| 74 | #008-90 | EHA105 | TET-ORI | complex   |
| 75 | #009-1  | EHA105 | TET-ORI | complex   |
| 76 | #009-2  | EHA105 | TET-ORI | monomeric |
| 77 | #009-3  | EHA105 | TET-ORI | monomeric |
| 78 | #009-4  | EHA105 | TET-ORI | monomeric |
| 79 | #009-5  | EHA105 | TET-ORI | complex   |
| 80 | #009-10 | EHA105 | TET-ORI | complex   |
| 81 | #009-11 | EHA105 | TET-ORI | monomeric |
| 82 | #009-12 | EHA105 | TET-ORI | complex   |
| 83 | #009-13 | EHA105 | TET-ORI | monomeric |
| 84 | #009-14 | EHA105 | TET-ORI | complex   |
| 85 | #009-15 | EHA105 | TET-ORI | monomeric |
| 86 | #009-16 | EHA105 | TET-ORI | monomeric |
| 87 | #009-17 | EHA105 | TET-ORI | monomeric |
| 88 | #009-18 | EHA105 | TET-ORI | monomeric |
| 89 | #009-19 | EHA105 | TET-ORI | monomeric |
| 90 | #009-21 | EHA106 | TET-ORI | monomeric |
| 91 | #009-22 | EHA105 | TET-ORI | complex   |
| 92 | #009-23 | EHA105 | TET-ORI | monomeric |
| 93 | #009-24 | EHA105 | TET-ORI | monomeric |

|     |         |        |         |           |
|-----|---------|--------|---------|-----------|
| 94  | #009-25 | EHA105 | TET-ORI | monomeric |
| 95  | #009-26 | EHA105 | TET-ORI | monomeric |
| 96  | #009-27 | EHA105 | TET-ORI | monomeric |
| 97  | #009-28 | EHA105 | TET-ORI | monomeric |
| 98  | #011-29 | EHA105 | TET-ORI | complex   |
| 99  | #011-30 | EHA105 | TET-ORI | monomeric |
| 100 | #011-31 | EHA105 | TET-ORI | complex   |
| 101 | #011-32 | EHA105 | TET-ORI | complex   |
| 102 | #011-33 | EHA105 | TET-ORI | complex   |
| 103 | #011-34 | EHA105 | TET-ORI | monomeric |
| 104 | #011-35 | EHA105 | TET-ORI | monomeric |
| 105 | #011-36 | EHA105 | TET-ORI | monomeric |
| 106 | #011-37 | EHA105 | TET-ORI | monomeric |
| 107 | #011-38 | EHA105 | TET-ORI | monomeric |

*N. benthamiana* with AMP-ORI:

|    |         |        |         |           |
|----|---------|--------|---------|-----------|
| 1  | #050-1  | EHA105 | AMP-ORI | monomeric |
| 2  | #050-2  | EHA105 | AMP-ORI | monomeric |
| 3  | #050-3  | EHA105 | AMP-ORI | monomeric |
| 4  | #050-4  | EHA105 | AMP-ORI | monomeric |
| 5  | #050-5  | EHA105 | AMP-ORI | monomeric |
| 6  | #050-6  | EHA105 | AMP-ORI | monomeric |
| 7  | #050-7  | EHA105 | AMP-ORI | complex   |
| 8  | #050-8  | EHA105 | AMP-ORI | complex   |
| 9  | #050-9  | EHA105 | AMP-ORI | monomeric |
| 10 | #050-10 | EHA105 | AMP-ORI | monomeric |
| 11 | #050-11 | EHA105 | AMP-ORI | monomeric |
| 12 | #050-12 | EHA105 | AMP-ORI | complex   |
| 13 | #050-13 | EHA105 | AMP-ORI | complex   |
| 14 | #050-14 | EHA105 | AMP-ORI | complex   |
| 15 | #050-15 | EHA105 | AMP-ORI | monomeric |
| 16 | #050-16 | EHA105 | AMP-ORI | monomeric |
| 17 | #050-17 | EHA105 | AMP-ORI | complex   |
| 18 | #050-18 | EHA105 | AMP-ORI | monomeric |
| 19 | #050-19 | EHA105 | AMP-ORI | monomeric |
| 20 | #050-21 | EHA105 | AMP-ORI | monomeric |
| 21 | #050-22 | EHA105 | AMP-ORI | complex   |
| 22 | #050-23 | EHA105 | AMP-ORI | complex   |
| 23 | #050-24 | EHA105 | AMP-ORI | monomeric |
| 24 | #050-25 | EHA105 | AMP-ORI | monomeric |
| 25 | #050-26 | EHA105 | AMP-ORI | monomeric |
| 26 | #050-27 | EHA105 | AMP-ORI | monomeric |
| 27 | #050-28 | EHA105 | AMP-ORI | monomeric |
| 28 | #050-29 | EHA105 | AMP-ORI | complex   |
| 29 | #050-30 | EHA105 | AMP-ORI | monomeric |
| 30 | #050-31 | EHA105 | AMP-ORI | complex   |
| 31 | #050-33 | EHA105 | AMP-ORI | monomeric |
| 32 | #050-34 | EHA105 | AMP-ORI | monomeric |

|    |         |        |         |           |
|----|---------|--------|---------|-----------|
| 33 | #050-35 | EHA105 | AMP-ORI | monomeric |
| 34 | #050-36 | EHA105 | AMP-ORI | monomeric |
| 35 | #050-37 | EHA105 | AMP-ORI | monomeric |
| 36 | #050-38 | EHA105 | AMP-ORI | monomeric |
| 37 | #050-39 | EHA105 | AMP-ORI | monomeric |
| 38 | #050-40 | EHA105 | AMP-ORI | monomeric |
| 39 | #052-1  | EHA105 | AMP-ORI | complex   |
| 40 | #052-2  | EHA105 | AMP-ORI | complex   |
| 41 | #052-3  | EHA105 | AMP-ORI | monomeric |
| 42 | #052-4  | EHA105 | AMP-ORI | monomeric |
| 43 | #052-5  | EHA105 | AMP-ORI | monomeric |
| 44 | #052-6  | EHA105 | AMP-ORI | monomeric |
| 45 | #052-7  | EHA105 | AMP-ORI | monomeric |
| 46 | #052-8  | EHA105 | AMP-ORI | monomeric |
| 47 | #052-9  | EHA105 | AMP-ORI | complex   |
| 48 | #052-10 | EHA105 | AMP-ORI | monomeric |
| 49 | #052-11 | EHA105 | AMP-ORI | monomeric |
| 50 | #052-12 | EHA105 | AMP-ORI | complex   |
| 51 | #052-13 | EHA105 | AMP-ORI | monomeric |
| 52 | #052-14 | EHA105 | AMP-ORI | monomeric |
| 53 | #052-15 | EHA105 | AMP-ORI | monomeric |
| 54 | #052-16 | EHA105 | AMP-ORI | monomeric |
| 55 | #052-17 | EHA105 | AMP-ORI | complex   |
| 56 | #052-18 | EHA105 | AMP-ORI | complex   |
| 57 | #052-19 | EHA105 | AMP-ORI | monomeric |
| 58 | #052-20 | EHA105 | AMP-ORI | monomeric |
| 59 | #052-21 | EHA105 | AMP-ORI | complex   |
| 60 | #052-22 | EHA105 | AMP-ORI | complex   |
| 61 | #052-23 | EHA105 | AMP-ORI | monomeric |
| 62 | #052-24 | EHA105 | AMP-ORI | monomeric |
| 63 | #052-25 | EHA105 | AMP-ORI | complex   |
| 64 | #052-26 | EHA105 | AMP-ORI | monomeric |
| 65 | #052-27 | EHA105 | AMP-ORI | complex   |
| 66 | #052-28 | EHA105 | AMP-ORI | complex   |
| 67 | #052-29 | EHA105 | AMP-ORI | monomeric |
| 68 | #052-30 | EHA105 | AMP-ORI | monomeric |
| 69 | #052-31 | EHA105 | AMP-ORI | monomeric |
| 70 | #052-32 | EHA105 | AMP-ORI | complex   |
| 71 | #052-33 | EHA105 | AMP-ORI | monomeric |
| 72 | #052-34 | EHA105 | AMP-ORI | complex   |
| 73 | #052-35 | EHA105 | AMP-ORI | complex   |
| 74 | #052-36 | EHA105 | AMP-ORI | monomeric |
| 75 | #052-37 | EHA105 | AMP-ORI | monomeric |
| 76 | #052-38 | EHA105 | AMP-ORI | monomeric |
| 77 | #052-40 | EHA105 | AMP-ORI | monomeric |
| 78 | #052-41 | EHA105 | AMP-ORI | monomeric |
| 79 | #052-42 | EHA105 | AMP-ORI | complex   |
| 80 | #052-43 | EHA105 | AMP-ORI | monomeric |

|     |         |        |         |           |
|-----|---------|--------|---------|-----------|
| 81  | #052-44 | EHA105 | AMP-ORI | complex   |
| 82  | #052-45 | EHA105 | AMP-ORI | complex   |
| 83  | #052-46 | EHA105 | AMP-ORI | monomeric |
| 84  | #052-48 | EHA105 | AMP-ORI | monomeric |
| 85  | #052-49 | EHA105 | AMP-ORI | monomeric |
| 86  | #052-50 | EHA105 | AMP-ORI | monomeric |
| 87  | #052-51 | EHA105 | AMP-ORI | monomeric |
| 88  | #052-52 | EHA105 | AMP-ORI | monomeric |
| 89  | #052-53 | EHA105 | AMP-ORI | complex   |
| 90  | #052-54 | EHA105 | AMP-ORI | monomeric |
| 91  | #052-55 | EHA105 | AMP-ORI | complex   |
| 92  | #052-56 | EHA105 | AMP-ORI | monomeric |
| 93  | #052-57 | EHA105 | AMP-ORI | monomeric |
| 94  | #052-58 | EHA105 | AMP-ORI | monomeric |
| 95  | #052-59 | EHA105 | AMP-ORI | monomeric |
| 96  | #052-60 | EHA105 | AMP-ORI | complex   |
| 97  | #052-61 | EHA105 | AMP-ORI | monomeric |
| 98  | #052-62 | EHA105 | AMP-ORI | monomeric |
| 99  | #052-63 | EHA105 | AMP-ORI | complex   |
| 100 | #052-64 | EHA105 | AMP-ORI | monomeric |
| 101 | #052-65 | EHA105 | AMP-ORI | monomeric |
| 102 | #052-66 | EHA105 | AMP-ORI | complex   |
| 103 | #052-67 | EHA105 | AMP-ORI | monomeric |
| 104 | #052-68 | EHA105 | AMP-ORI | complex   |

*N. benthamiana* with *VirD2*Ω:

|    |        |        |         |           |
|----|--------|--------|---------|-----------|
| 1  | #005-1 | At1959 | TET-ORI | monomeric |
| 2  | #005-2 | At1959 | TET-ORI | monomeric |
| 3  | #005-3 | At1959 | TET-ORI | monomeric |
| 4  | #005-4 | At1959 | TET-ORI | complex   |
| 5  | #005-6 | At1959 | TET-ORI | complex   |
| 6  | #005-7 | At1959 | TET-ORI | monomeric |
| 7  | #005-8 | At1959 | TET-ORI | complex   |
| 8  | #005-9 | At1959 | TET-ORI | monomeric |
| 9  | #055-1 | At1959 | AMP-ORI | monomeric |
| 10 | #055-2 | At1959 | AMP-ORI | monomeric |

*Arabidopsis Col-0*

|    |         |        |         |           |
|----|---------|--------|---------|-----------|
| 1  | #021-1  | EHA105 | AMP-ORI | monomeric |
| 2  | #021-2  | EHA105 | AMP-ORI | monomeric |
| 3  | #021-3  | EHA105 | AMP-ORI | complex   |
| 4  | #021-4  | EHA105 | AMP-ORI | complex   |
| 5  | #021-5  | EHA105 | AMP-ORI | monomeric |
| 6  | #021-6  | EHA105 | AMP-ORI | monomeric |
| 7  | #021-7  | EHA105 | AMP-ORI | monomeric |
| 8  | #021-8  | EHA105 | AMP-ORI | monomeric |
| 9  | #021-9  | EHA105 | AMP-ORI | monomeric |
| 10 | #021-10 | EHA105 | AMP-ORI | monomeric |
| 11 | #021-11 | EHA105 | AMP-ORI | monomeric |
| 12 | #021-12 | EHA105 | AMP-ORI | monomeric |

|    |         |        |         |           |
|----|---------|--------|---------|-----------|
| 13 | #021-13 | EHA105 | AMP-ORI | monomeric |
|----|---------|--------|---------|-----------|

*Arabidopsis efr-1*

|    |         |        |         |           |
|----|---------|--------|---------|-----------|
| 1  | #022-1  | EHA105 | AMP-ORI | monomeric |
| 2  | #022-2  | EHA105 | AMP-ORI | monomeric |
| 3  | #022-3  | EHA105 | AMP-ORI | monomeric |
| 4  | #022-4  | EHA105 | AMP-ORI | monomeric |
| 5  | #022-5  | EHA105 | AMP-ORI | monomeric |
| 6  | #022-6  | EHA105 | AMP-ORI | monomeric |
| 7  | #022-7  | EHA105 | AMP-ORI | monomeric |
| 8  | #022-8  | EHA105 | AMP-ORI | monomeric |
| 9  | #022-9  | EHA105 | AMP-ORI | monomeric |
| 10 | #022-10 | EHA105 | AMP-ORI | monomeric |
| 11 | #022-11 | EHA105 | AMP-ORI | monomeric |
| 12 | #022-12 | EHA105 | AMP-ORI | monomeric |
| 13 | #022-13 | EHA105 | AMP-ORI | monomeric |
| 14 | #022-14 | EHA105 | AMP-ORI | monomeric |
| 15 | #022-15 | EHA105 | AMP-ORI | monomeric |
| 16 | #022-16 | EHA105 | AMP-ORI | monomeric |
| 17 | #022-17 | EHA105 | AMP-ORI | monomeric |
| 18 | #022-18 | EHA105 | AMP-ORI | monomeric |
| 19 | #022-19 | EHA105 | AMP-ORI | monomeric |
| 20 | #022-20 | EHA105 | AMP-ORI | monomeric |
| 21 | #022-21 | EHA105 | AMP-ORI | monomeric |
| 22 | #022-22 | EHA105 | AMP-ORI | monomeric |
| 23 | #022-23 | EHA105 | AMP-ORI | monomeric |
| 24 | #022-24 | EHA105 | AMP-ORI | monomeric |
| 25 | #022-25 | EHA105 | AMP-ORI | monomeric |
| 26 | #022-26 | EHA105 | AMP-ORI | monomeric |
| 27 | #022-27 | EHA105 | AMP-ORI | monomeric |
| 28 | #022-28 | EHA105 | AMP-ORI | monomeric |
| 29 | #022-29 | EHA105 | AMP-ORI | monomeric |
| 30 | #022-30 | EHA105 | AMP-ORI | monomeric |
| 31 | #022-31 | EHA105 | AMP-ORI | monomeric |
| 32 | #022-32 | EHA105 | AMP-ORI | monomeric |
| 33 | #022-33 | EHA105 | AMP-ORI | monomeric |
| 34 | #022-34 | EHA105 | AMP-ORI | monomeric |
| 35 | #022-35 | EHA105 | AMP-ORI | monomeric |
| 36 | #022-36 | EHA105 | AMP-ORI | monomeric |
| 37 | #022-37 | EHA105 | AMP-ORI | monomeric |
| 38 | #022-38 | EHA105 | AMP-ORI | monomeric |
| 39 | #022-39 | EHA105 | AMP-ORI | monomeric |
| 40 | #022-40 | EHA105 | AMP-ORI | monomeric |
| 41 | #022-41 | EHA105 | AMP-ORI | monomeric |
| 42 | #022-42 | EHA105 | AMP-ORI | monomeric |
| 43 | #022-43 | EHA105 | AMP-ORI | monomeric |
| 44 | #022-44 | EHA105 | AMP-ORI | monomeric |
| 45 | #022-45 | EHA105 | AMP-ORI | monomeric |

|    |         |        |         |           |
|----|---------|--------|---------|-----------|
| 46 | #022-46 | EHA105 | AMP-ORI | monomeric |
| 47 | #022-47 | EHA105 | AMP-ORI | monomeric |
| 48 | #022-48 | EHA105 | AMP-ORI | monomeric |
| 49 | #025-49 | EHA105 | AMP-ORI | monomeric |
| 50 | #046-1  | EHA105 | AMP-ORI | monomeric |
| 51 | #046-2  | EHA105 | AMP-ORI | monomeric |
| 52 | #046-3  | EHA105 | AMP-ORI | monomeric |
| 53 | #046-4  | EHA105 | AMP-ORI | monomeric |
| 54 | #046-5  | EHA105 | AMP-ORI | monomeric |
| 55 | #046-6  | EHA105 | AMP-ORI | monomeric |
| 56 | #046-7  | EHA105 | AMP-ORI | monomeric |
| 57 | #046-8  | EHA105 | AMP-ORI | monomeric |
| 58 | #046-9  | EHA105 | AMP-ORI | monomeric |
| 59 | #046-10 | EHA105 | AMP-ORI | monomeric |
| 60 | #046-11 | EHA105 | AMP-ORI | monomeric |
| 61 | #046-12 | EHA105 | AMP-ORI | monomeric |
| 62 | #046-13 | EHA105 | AMP-ORI | monomeric |
| 63 | #046-14 | EHA105 | AMP-ORI | monomeric |
| 64 | #046-15 | EHA105 | AMP-ORI | monomeric |
| 65 | #046-16 | EHA105 | AMP-ORI | monomeric |
| 66 | #046-17 | EHA105 | AMP-ORI | monomeric |
| 67 | #046-18 | EHA105 | AMP-ORI | monomeric |
| 68 | #046-19 | EHA105 | AMP-ORI | monomeric |
| 69 | #046-20 | EHA105 | AMP-ORI | monomeric |
| 70 | #046-21 | EHA105 | AMP-ORI | complex   |
| 71 | #046-22 | EHA105 | AMP-ORI | monomeric |
| 72 | #046-23 | EHA105 | AMP-ORI | monomeric |
| 73 | #046-24 | EHA105 | AMP-ORI | monomeric |
| 74 | #046-25 | EHA105 | AMP-ORI | monomeric |
| 75 | #046-26 | EHA105 | AMP-ORI | monomeric |
| 76 | #046-27 | EHA105 | AMP-ORI | monomeric |
| 77 | #046-28 | EHA105 | AMP-ORI | monomeric |
| 78 | #046-29 | EHA105 | AMP-ORI | monomeric |
| 79 | #046-30 | EHA105 | AMP-ORI | monomeric |
| 80 | #046-31 | EHA105 | AMP-ORI | monomeric |
| 81 | #046-32 | EHA105 | AMP-ORI | monomeric |
| 82 | #046-33 | EHA105 | AMP-ORI | monomeric |
| 83 | #046-34 | EHA105 | AMP-ORI | monomeric |
| 84 | #046-35 | EHA105 | AMP-ORI | monomeric |
| 85 | #046-36 | EHA105 | AMP-ORI | monomeric |
| 86 | #046-37 | EHA105 | AMP-ORI | monomeric |
| 87 | #046-38 | EHA105 | AMP-ORI | monomeric |
| 88 | #046-39 | EHA105 | AMP-ORI | monomeric |
| 89 | #046-40 | EHA105 | AMP-ORI | monomeric |
| 90 | #046-41 | EHA105 | AMP-ORI | monomeric |
| 91 | #046-42 | EHA105 | AMP-ORI | monomeric |
| 92 | #046-43 | EHA105 | AMP-ORI | monomeric |
| 93 | #046-44 | EHA105 | AMP-ORI | monomeric |

|     |         |        |         |           |
|-----|---------|--------|---------|-----------|
| 94  | #046-45 | EHA105 | AMP-ORI | monomeric |
| 95  | #046-46 | EHA105 | AMP-ORI | monomeric |
| 96  | #046-47 | EHA105 | AMP-ORI | monomeric |
| 97  | #046-48 | EHA105 | AMP-ORI | monomeric |
| 98  | #046-49 | EHA105 | AMP-ORI | monomeric |
| 99  | #047-1  | EHA105 | AMP-ORI | monomeric |
| 100 | #047-2  | EHA105 | AMP-ORI | monomeric |
| 101 | #047-3  | EHA105 | AMP-ORI | complex   |
| 102 | #047-4  | EHA105 | AMP-ORI | monomeric |
| 103 | #047-5  | EHA105 | AMP-ORI | monomeric |
| 104 | #047-6  | EHA105 | AMP-ORI | monomeric |
| 105 | #047-7  | EHA105 | AMP-ORI | monomeric |
| 106 | #047-8  | EHA105 | AMP-ORI | monomeric |
| 107 | #047-9  | EHA105 | AMP-ORI | monomeric |
| 108 | #047-11 | EHA105 | AMP-ORI | monomeric |
| 109 | #047-12 | EHA105 | AMP-ORI | monomeric |
| 110 | #047-13 | EHA105 | AMP-ORI | monomeric |
| 111 | #047-14 | EHA105 | AMP-ORI | monomeric |
| 112 | #047-15 | EHA105 | AMP-ORI | monomeric |
| 113 | #047-16 | EHA105 | AMP-ORI | monomeric |
| 114 | #047-17 | EHA105 | AMP-ORI | monomeric |
| 115 | #047-18 | EHA105 | AMP-ORI | monomeric |
| 116 | #047-19 | EHA105 | AMP-ORI | monomeric |
| 117 | #047-20 | EHA105 | AMP-ORI | monomeric |
| 118 | #047-21 | EHA105 | AMP-ORI | monomeric |
| 119 | #047-22 | EHA105 | AMP-ORI | monomeric |
| 120 | #047-23 | EHA105 | AMP-ORI | monomeric |
| 121 | #041-1  | EHA105 | AMP-ORI | monomeric |
| 122 | #041-2  | EHA105 | AMP-ORI | monomeric |
| 123 | #041-3  | EHA105 | AMP-ORI | monomeric |
| 124 | #041-4  | EHA105 | AMP-ORI | monomeric |
| 125 | #041-5  | EHA105 | AMP-ORI | monomeric |
| 126 | #041-6  | EHA105 | AMP-ORI | monomeric |
| 127 | #041-7  | EHA105 | AMP-ORI | monomeric |
| 128 | #041-8  | EHA105 | AMP-ORI | monomeric |
| 129 | #041-9  | EHA105 | AMP-ORI | monomeric |
| 130 | #041-10 | EHA105 | AMP-ORI | monomeric |

*Arabidopsis efr-1/ku80*

|   |        |        |         |           |
|---|--------|--------|---------|-----------|
| 1 | #043-1 | EHA105 | AMP-ORI | monomeric |
| 2 | #043-2 | EHA105 | AMP-ORI | monomeric |
| 3 | #043-3 | EHA105 | AMP-ORI | monomeric |
| 4 | #043-4 | EHA105 | AMP-ORI | monomeric |
| 5 | #043-5 | EHA105 | AMP-ORI | monomeric |
| 6 | #043-6 | EHA105 | AMP-ORI | monomeric |
| 7 | #043-7 | EHA105 | AMP-ORI | monomeric |
| 8 | #043-8 | EHA105 | AMP-ORI | monomeric |
| 9 | #043-9 | EHA105 | AMP-ORI | monomeric |



|    |         |        |         |           |
|----|---------|--------|---------|-----------|
| 10 | #043-10 | EHA105 | AMP-ORI | monomeric |
| 11 | #043-11 | EHA105 | AMP-ORI | monomeric |
| 12 | #043-12 | EHA105 | AMP-ORI | monomeric |
| 13 | #043-15 | EHA105 | AMP-ORI | monomeric |
| 14 | #043-16 | EHA105 | AMP-ORI | monomeric |
| 15 | #043-17 | EHA105 | AMP-ORI | monomeric |
| 16 | #043-18 | EHA105 | AMP-ORI | monomeric |
| 17 | #043-19 | EHA105 | AMP-ORI | monomeric |
| 18 | #043-20 | EHA105 | AMP-ORI | monomeric |
| 19 | #043-21 | EHA105 | AMP-ORI | monomeric |
| 20 | #043-22 | EHA105 | AMP-ORI | monomeric |
| 21 | #043-23 | EHA105 | AMP-ORI | monomeric |
| 22 | #043-24 | EHA105 | AMP-ORI | monomeric |
| 23 | #043-25 | EHA105 | AMP-ORI | complex   |
| 24 | #043-26 | EHA105 | AMP-ORI | monomeric |
| 25 | #043-27 | EHA105 | AMP-ORI | monomeric |
| 26 | #043-28 | EHA105 | AMP-ORI | monomeric |
| 27 | #043-29 | EHA105 | AMP-ORI | monomeric |
| 28 | #043-30 | EHA105 | AMP-ORI | complex   |
| 29 | #043-31 | EHA105 | AMP-ORI | monomeric |
| 30 | #043-32 | EHA105 | AMP-ORI | monomeric |
| 31 | #043-33 | EHA105 | AMP-ORI | monomeric |
| 32 | #043-34 | EHA105 | AMP-ORI | monomeric |
| 33 | #043-35 | EHA105 | AMP-ORI | monomeric |
| 34 | #043-36 | EHA105 | AMP-ORI | monomeric |
| 35 | #043-37 | EHA105 | AMP-ORI | monomeric |
| 36 | #043-38 | EHA105 | AMP-ORI | monomeric |
| 37 | #043-39 | EHA105 | AMP-ORI | monomeric |
| 38 | #043-40 | EHA105 | AMP-ORI | monomeric |
| 39 | #043-41 | EHA105 | AMP-ORI | complex   |
| 40 | #043-42 | EHA105 | AMP-ORI | monomeric |
| 41 | #043-43 | EHA105 | AMP-ORI | monomeric |
| 42 | #043-44 | EHA105 | AMP-ORI | monomeric |
| 43 | #043-45 | EHA105 | AMP-ORI | monomeric |
| 44 | #043-46 | EHA105 | AMP-ORI | monomeric |
| 45 | #043-47 | EHA105 | AMP-ORI | monomeric |
| 46 | #045-1  | EHA105 | AMP-ORI | monomeric |
| 47 | #045-2  | EHA105 | AMP-ORI | monomeric |
| 48 | #045-3  | EHA105 | AMP-ORI | monomeric |
| 49 | #045-4  | EHA105 | AMP-ORI | monomeric |
| 50 | #045-5  | EHA105 | AMP-ORI | monomeric |
| 51 | #045-6  | EHA105 | AMP-ORI | monomeric |
| 52 | #045-7  | EHA105 | AMP-ORI | monomeric |
| 53 | #045-8  | EHA105 | AMP-ORI | monomeric |
| 54 | #045-9  | EHA105 | AMP-ORI | monomeric |
| 55 | #045-10 | EHA105 | AMP-ORI | monomeric |
| 56 | #045-11 | EHA105 | AMP-ORI | monomeric |
| 57 | #045-12 | EHA105 | AMP-ORI | monomeric |

|    |         |        |         |           |
|----|---------|--------|---------|-----------|
| 58 | #045-13 | EHA105 | AMP-ORI | complex   |
| 59 | #045-14 | EHA105 | AMP-ORI | monomeric |
| 60 | #045-15 | EHA105 | AMP-ORI | monomeric |
| 61 | #045-16 | EHA105 | AMP-ORI | monomeric |
| 62 | #045-17 | EHA105 | AMP-ORI | monomeric |
| 63 | #045-18 | EHA105 | AMP-ORI | monomeric |
| 64 | #045-19 | EHA105 | AMP-ORI | monomeric |
| 65 | #045-20 | EHA105 | AMP-ORI | monomeric |
| 66 | #045-21 | EHA105 | AMP-ORI | monomeric |
| 67 | #045-22 | EHA105 | AMP-ORI | monomeric |
| 68 | #045-23 | EHA105 | AMP-ORI | monomeric |
| 69 | #045-24 | EHA105 | AMP-ORI | monomeric |
| 70 | #045-25 | EHA105 | AMP-ORI | monomeric |
| 71 | #045-26 | EHA105 | AMP-ORI | monomeric |
| 72 | #045-27 | EHA105 | AMP-ORI | monomeric |
| 73 | #045-28 | EHA105 | AMP-ORI | monomeric |
| 74 | #045-29 | EHA105 | AMP-ORI | monomeric |
| 75 | #045-30 | EHA105 | AMP-ORI | monomeric |

---

\* Determination of monomeric or complex structure was done by agarose gel analysis. When result was uncertain T-circles were further sequenced and classified accordingly.

Supplemental Table 2. Sequenced T-DNA junctions of monomeric T-circles from *N. benthamiana*

| Sample No. | Strain | Construct | RB <sup>a</sup>             | Microhomology   | Filler DNA | LB <sup>a</sup> |
|------------|--------|-----------|-----------------------------|-----------------|------------|-----------------|
| #001-2     | EHA105 | TET-ORI   | precise                     | 0               | 1 (T)      | -25             |
| #001-4     | EHA105 | TET-ORI   | precise                     | 0               | 0          | -11             |
| #001-5     | EHA105 | TET-ORI   | -2                          | 2 (TT)          | 0          | -32             |
| #001-6     | EHA105 | TET-ORI   | precise                     | 12 <sup>b</sup> | 0          | precise         |
| #002-19    | EHA105 | TET-ORI   | precise                     | 12 <sup>b</sup> | 0          | precise         |
| #002-22    | EHA105 | TET-ORI   | precise                     | 12 <sup>b</sup> | 0          | precise         |
| #002-25    | EHA105 | TET-ORI   | precise                     | 0               | 0          | -82             |
| #002-26    | EHA105 | TET-ORI   | precise                     | 12 <sup>b</sup> | 0          | precise         |
| #003-52    | EHA105 | TET-ORI   | precise                     | 12 <sup>b</sup> | 0          | precise         |
| #003-53    | EHA105 | TET-ORI   | precise                     | 12 <sup>b</sup> | 0          | precise         |
| #003-55    | EHA105 | TET-ORI   | precise + 2 <sup>c</sup>    | 2 (CA)          | 0          | -98             |
| #003-56    | EHA105 | TET-ORI   | precise                     | 0               | 1 (T)      | -23             |
| #003-57    | EHA105 | TET-ORI   | precise                     | 12 <sup>b</sup> | 0          | precise         |
| #003-58    | EHA105 | TET-ORI   | -1                          | 3 (TTG)         | 0          | -52             |
| #003-59    | EHA105 | TET-ORI   | precise                     | 12 <sup>b</sup> | 0          | precise         |
| #003-63    | EHA105 | TET-ORI   | precise                     | 12 <sup>b</sup> | 0          | precise         |
| #003-65    | EHA105 | TET-ORI   | precise                     | 0               | 0          | -65             |
| #003-66    | EHA105 | TET-ORI   | precise                     | 12 <sup>b</sup> | 0          | precise         |
| #003-67    | EHA105 | TET-ORI   | precise                     | 12 <sup>b</sup> | 0          | precise         |
| #003-70    | EHA105 | TET-ORI   | precise                     | 12 <sup>b</sup> | 0          | precise         |
| #008-55    | EHA105 | TET-ORI   | precise                     | 12 <sup>b</sup> | 0          | precise         |
| #008-57    | EHA105 | TET-ORI   | -2                          | 0               | 1 (A)      | -27             |
| #008-59    | EHA105 | TET-ORI   | precise                     | 12 <sup>b</sup> | 0          | precise         |
| #008-67    | EHA105 | TET-ORI   | precise                     | 12 <sup>b</sup> | 0          | precise         |
| #008-68    | EHA105 | TET-ORI   | precise                     | 12 <sup>b</sup> | 0          | precise         |
| #008-69    | EHA105 | TET-ORI   | precise + 2 bp <sup>c</sup> | 2 (CA)          | 0          | -1              |
| #008-71    | EHA105 | TET-ORI   | precise                     | 12 <sup>b</sup> | 0          | precise         |
| #008-72    | EHA105 | TET-ORI   | precise                     | 0               | 1 (A)      | -69             |
| #008-75    | EHA105 | TET-ORI   | precise                     | 0               | 1 (A)      | -8              |
| #008-82    | EHA105 | TET-ORI   | precise                     | 12 <sup>b</sup> | 0          | precise         |
| #009-2     | EHA105 | TET-ORI   | -3                          | 0               | 0          | -71             |
| #009-3     | EHA105 | TET-ORI   | precise                     | 0               | 4 (AAAA)   | -175            |
| #009-4     | EHA105 | TET-ORI   | precise                     | 12 <sup>b</sup> | 0          | precise         |
| #009-11    | EHA105 | TET-ORI   | precise                     | 12 <sup>b</sup> | 0          | precise         |
| #009-13    | EHA105 | TET-ORI   | precise                     | 0               | 0          | -22             |
| #009-17    | EHA105 | TET-ORI   | precise                     | 12 <sup>b</sup> | 0          | precise         |
| #009-18    | EHA105 | TET-ORI   | precise                     | 12 <sup>b</sup> | 0          | precise         |
| #009-19    | EHA105 | TET-ORI   | precise                     | 12 <sup>b</sup> | 0          | precise         |

|         |        |         |                        |                 |                                          |         |
|---------|--------|---------|------------------------|-----------------|------------------------------------------|---------|
| #009-21 | EHA106 | TET-ORI | precise                | 0               | 1 (T)                                    | -96     |
| #009-26 | EHA105 | TET-ORI | precise                | 0               | 0                                        | -70     |
| #011-30 | EHA105 | TET-ORI | -16                    | 0               | 0                                        | -16     |
| #011-34 | EHA105 | TET-ORI | precise                | 12 <sup>b</sup> | 0                                        | precise |
| #011-35 | EHA105 | TET-ORI | precise + 7 bp         | 10              | 0                                        | -100    |
|         |        |         |                        | (TGTTTGACAG)    |                                          |         |
| #011-36 | EHA105 | TET-ORI | precise                | 0               | 0                                        | -62     |
| #011-38 | EHA105 | TET-ORI | precise                | 12 <sup>b</sup> | 0                                        | precise |
| #050-1  | EHA105 | AMP-ORI | precise                | 12              | 0                                        | precise |
| #050-5  | EHA105 | AMP-ORI | precise                | 0               | 1 (A)                                    | -61     |
| #050-6  | EHA105 | AMP-ORI | -1                     | 1 (G)           | 0                                        | -632    |
| #050-9  | EHA105 | AMP-ORI | precise                | 12 <sup>b</sup> | 0                                        | precise |
| #050-10 | EHA105 | AMP-ORI | precise                | 12 <sup>b</sup> | 0                                        | precise |
| #050-11 | EHA105 | AMP-ORI | precise                | 0               | 0                                        | -629    |
| #050-18 | EHA105 | AMP-ORI | -291                   | 0               | 2 (GT)                                   | -264    |
| #050-24 | EHA105 | AMP-ORI | -10                    | 0               | 0                                        | -229    |
| #050-27 | EHA105 | AMP-ORI | precise                | 12 <sup>b</sup> | 0                                        | precise |
| #050-30 | EHA105 | AMP-ORI | precise + <sup>d</sup> | 1 (C)           | 0                                        | -311    |
| #050-35 | EHA105 | AMP-ORI | precise                | 12 <sup>b</sup> | 0                                        | precise |
| #050-37 | EHA105 | AMP-ORI | -75                    | 0               | 4 (AGCT)                                 | -464    |
| #050-40 | EHA105 | AMP-ORI | precise                | 0               | 0                                        | -130    |
| #052-4  | EHA105 | AMP-ORI | -39                    | 0               | 0                                        | -644    |
| #052-5  | EHA105 | AMP-ORI | precise                | 0               | 1 (T)                                    | -92     |
| #052-13 | EHA105 | AMP-ORI | precise                | 12 <sup>b</sup> | 0                                        | precise |
| #052-14 | EHA105 | AMP-ORI | precise                | 12 <sup>b</sup> | 0                                        | precise |
| #052-16 | EHA105 | AMP-ORI | precise                | 0               | 1 (A)                                    | -761    |
| #052-19 | EHA105 | AMP-ORI | -1                     | 0               | 0                                        | -408    |
| #052-24 | EHA105 | AMP-ORI | precise + <sup>d</sup> | 1 (C)           | 13 bp of T-DNA or binary vector sequence | -560    |
| #052-26 | EHA105 | AMP-ORI | -2                     | 0               | 0                                        | -75     |
| #052-29 | EHA105 | AMP-ORI | -24                    | 0               | 0                                        | -410    |
| #052-30 | EHA105 | AMP-ORI | precise                | 0               | 0                                        | -579    |
| #052-38 | EHA105 | AMP-ORI | precise                | 12 <sup>b</sup> | 0                                        | precise |
| #052-43 | EHA105 | AMP-ORI | precise                | 12 <sup>b</sup> | 0                                        | precise |
| #052-46 | EHA105 | AMP-ORI | precise                | 1 (A)           | 0                                        | -43     |
| #052-47 | EHA105 | AMP-ORI | precise                | 0               | 1 (A)                                    | -743    |
| #052-48 | EHA105 | AMP-ORI | precise                | 12 <sup>b</sup> | 0                                        | precise |
| #052-49 | EHA105 | AMP-ORI | precise                | 0               | 0                                        | -758    |
| #052-50 | EHA105 | AMP-ORI | precise                | 12 <sup>b</sup> | 0                                        | precise |
| #052-51 | EHA105 | AMP-ORI | precise                | 12 <sup>b</sup> | 0                                        | precise |
| #052-54 | EHA105 | AMP-ORI | -342                   | 0               | 1 (G)                                    | -536    |

|         |        |         |         |                 |       |         |
|---------|--------|---------|---------|-----------------|-------|---------|
| #052-58 | EHA105 | AMP-ORI | precise | 2 (GA)          | 0     | -234    |
| #052-62 | EHA105 | AMP-ORI | precise | 12 <sup>b</sup> | 0     | precise |
| #052-65 | EHA105 | AMP-ORI | -2      | 0               | 1 (A) | -25     |

<sup>a</sup>Right border (RB) and left border (LB) numerical values represent the position in DNA relative to precise end; <sup>b</sup>12 bp can be a readthrough sequence of RB involved in microhomology with LB, or a precise RB joined to a precise LB end (i.e., no readthrough and microhomology); <sup>c</sup>The two nucleotides after the precise RB (CA) can be a readthrough of a RB sequence involved in microhomology with a LB side, or precise RB without readthrough (CA comes from LB); <sup>d</sup>One nucleotide after precise RB (C) can be a readthrough of RB sequence involved in microhomology with LB side, or precise RB without readthrough (C comes from LB sequence).

Supplemental Table 3. Sequenced T-DNA junctions of monomeric T-circles from *Arabidopsis efr-1* and Col-0 plants

| Background   | Sample No. | Strain | Construct | RB <sup>a</sup> | Microhomology   | Filler DNA                                  | LB <sup>a</sup> |
|--------------|------------|--------|-----------|-----------------|-----------------|---------------------------------------------|-----------------|
| <i>efr-1</i> |            |        |           |                 |                 |                                             |                 |
|              | #022-2     | EHA105 | AMP-ORI   | precise         | 12 <sup>b</sup> | 0                                           | precise         |
|              | #022-3     | EHA105 | AMP-ORI   | precise         | 1 (A)           | 0                                           | -22             |
|              | #022-4     | EHA105 | AMP-ORI   | precise         | 12 <sup>b</sup> | 0                                           | precise         |
|              | #022-5     | EHA105 | AMP-ORI   | precise         | 12 <sup>b</sup> | 0                                           | precise         |
|              | #022-6     | EHA105 | AMP-ORI   | precise         | 12 <sup>b</sup> | 0                                           | precise         |
|              | #022-7     | EHA105 | AMP-ORI   | precise         | 0               | 5 (TAATA)                                   | precise         |
|              | #022-8     | EHA105 | AMP-ORI   | -8              | 0               | 26 (TTAAT<br>AGTTTAA<br>ACTGAAG<br>CGCAGAT) | precise         |
|              | #022-9     | EHA105 | AMP-ORI   | precise         | 12 <sup>b</sup> | 0                                           | precise         |
|              | #022-10    | EHA105 | AMP-ORI   | precise         | 12 <sup>b</sup> | 0                                           | precise         |
|              | #022-11    | EHA105 | AMP-ORI   | precise         | 12 <sup>b</sup> | 0                                           | precise         |
|              | #022-12    | EHA105 | AMP-ORI   | precise         | 12 <sup>b</sup> | 0                                           | precise         |
|              | #022-13    | EHA105 | AMP-ORI   | precise         | 12 <sup>b</sup> | 0                                           | precise         |
|              | #022-14    | EHA105 | AMP-ORI   | precise         | 12 <sup>b</sup> | 0                                           | precise         |
|              | #022-15    | EHA105 | AMP-ORI   | precise         | 12 <sup>b</sup> | 0                                           | precise         |
|              | #022-16    | EHA105 | AMP-ORI   | precise         | 12 <sup>b</sup> | 0                                           | precise         |
|              | #022-17    | EHA105 | AMP-ORI   | precise         | 12 <sup>b</sup> | 0                                           | precise         |
|              | #022-18    | EHA105 | AMP-ORI   | precise         | 0               | 1 (T)                                       | -9              |
|              | #022-19    | EHA105 | AMP-ORI   | precise         | 12 <sup>b</sup> | 0                                           | precise         |
|              | #022-20    | EHA105 | AMP-ORI   | precise         | 12 <sup>b</sup> | 0                                           | precise         |
|              | #022-22    | EHA105 | AMP-ORI   | precise         | 12 <sup>b</sup> | 0                                           | precise         |
|              | #022-23    | EHA105 | AMP-ORI   | precise         | 12 <sup>b</sup> | 0                                           | precise         |
|              | #022-24    | EHA105 | AMP-ORI   | precise         | 12 <sup>b</sup> | 0                                           | precise         |
|              | #022-25    | EHA105 | AMP-ORI   | precise         | 12 <sup>b</sup> | 0                                           | precise         |
|              | #022-26    | EHA105 | AMP-ORI   | -1              | 1 (G)           | 0                                           | -16             |
|              | #022-27    | EHA105 | AMP-ORI   | precise         | 0               | 1 (A)                                       | -15             |
|              | #022-28    | EHA105 | AMP-ORI   | precise         | 12 <sup>b</sup> | 0                                           | precise         |
|              | #022-29    | EHA105 | AMP-ORI   | precise         | 12 <sup>b</sup> | 0                                           | precise         |
|              | #022-30    | EHA105 | AMP-ORI   | precise         | 12 <sup>b</sup> | 0                                           | precise         |
|              | #022-31    | EHA105 | AMP-ORI   | precise         | 12 <sup>b</sup> | 0                                           | precise         |
|              | #022-32    | EHA105 | AMP-ORI   | precise         | 12 <sup>b</sup> | 0                                           | precise         |
|              | #022-33    | EHA105 | AMP-ORI   | precise         | 12 <sup>b</sup> | 0                                           | precise         |
|              | #022-34    | EHA105 | AMP-ORI   | -1              | 3 (TTG)         | 0                                           | -9              |
|              | #022-35    | EHA105 | AMP-ORI   | precise         | 12 <sup>b</sup> | 0                                           | precise         |
|              | #022-36    | EHA105 | AMP-ORI   | precise         | 12 <sup>b</sup> | 0                                           | precise         |
|              | #022-37    | EHA105 | AMP-ORI   | -13             | 4 (AAAC)        | 0                                           | -18             |

|         |        |         |         |                 |   |         |
|---------|--------|---------|---------|-----------------|---|---------|
| #022-38 | EHA105 | AMP-ORI | precise | 12 <sup>b</sup> | 0 | precise |
| #022-39 | EHA105 | AMP-ORI | precise | 12 <sup>b</sup> | 0 | precise |
| #022-40 | EHA105 | AMP-ORI | precise | 12 <sup>b</sup> | 0 | precise |
| #022-41 | EHA105 | AMP-ORI | precise | 1 (A)           | 0 | -6      |
| #022-42 | EHA105 | AMP-ORI | precise | 12 <sup>b</sup> | 0 | precise |
| #022-43 | EHA105 | AMP-ORI | precise | 12 <sup>b</sup> | 0 | precise |
| #022-44 | EHA105 | AMP-ORI | precise | 12 <sup>b</sup> | 0 | precise |
| #022-45 | EHA105 | AMP-ORI | precise | 12 <sup>b</sup> | 0 | precise |
| #022-46 | EHA105 | AMP-ORI | precise | 12 <sup>b</sup> | 0 | precise |
| #022-47 | EHA105 | AMP-ORI | precise | 12 <sup>b</sup> | 0 | precise |
| #022-48 | EHA105 | AMP-ORI | precise | 12 <sup>b</sup> | 0 | precise |
| #025-49 | EHA105 | AMP-ORI | precise | 12 <sup>b</sup> | 0 | precise |
| #046-1  | EHA105 | AMP-ORI | precise | 12 <sup>b</sup> | 0 | precise |
| #046-3  | EHA105 | AMP-ORI | precise | 12 <sup>b</sup> | 0 | precise |
| #046-4  | EHA105 | AMP-ORI | precise | 12 <sup>b</sup> | 0 | precise |
| #046-5  | EHA105 | AMP-ORI | precise | 12 <sup>b</sup> | 0 | precise |
| #046-6  | EHA105 | AMP-ORI | precise | 12 <sup>b</sup> | 0 | precise |
| #046-7  | EHA105 | AMP-ORI | precise | 12 <sup>b</sup> | 0 | precise |
| #046-10 | EHA105 | AMP-ORI | precise | 12 <sup>b</sup> | 0 | precise |
| #046-11 | EHA105 | AMP-ORI | precise | 12 <sup>b</sup> | 0 | precise |
| #046-12 | EHA105 | AMP-ORI | precise | 12 <sup>b</sup> | 0 | precise |
| #046-13 | EHA105 | AMP-ORI | precise | 12 <sup>b</sup> | 0 | precise |
| #046-14 | EHA105 | AMP-ORI | precise | 12 <sup>b</sup> | 0 | precise |
| #046-15 | EHA105 | AMP-ORI | precise | 12 <sup>b</sup> | 0 | precise |
| #046-16 | EHA105 | AMP-ORI | precise | 12 <sup>b</sup> | 0 | precise |
| #046-17 | EHA105 | AMP-ORI | precise | 12 <sup>b</sup> | 0 | precise |
| #046-18 | EHA105 | AMP-ORI | precise | 12 <sup>b</sup> | 0 | precise |
| #046-19 | EHA105 | AMP-ORI | precise | 12 <sup>b</sup> | 0 | precise |
| #046-20 | EHA105 | AMP-ORI | precise | 12 <sup>b</sup> | 0 | precise |
| #046-22 | EHA105 | AMP-ORI | precise | 12 <sup>b</sup> | 0 | precise |
| #046-23 | EHA105 | AMP-ORI | precise | 12 <sup>b</sup> | 0 | precise |
| #046-24 | EHA105 | AMP-ORI | precise | 12 <sup>b</sup> | 0 | precise |
| #046-26 | EHA105 | AMP-ORI | precise | 12 <sup>b</sup> | 0 | precise |
| #046-27 | EHA105 | AMP-ORI | precise | 12 <sup>b</sup> | 0 | precise |
| #046-28 | EHA105 | AMP-ORI | precise | 12 <sup>b</sup> | 0 | precise |
| #046-29 | EHA105 | AMP-ORI | precise | 12 <sup>b</sup> | 0 | precise |
| #046-30 | EHA105 | AMP-ORI | precise | 12 <sup>b</sup> | 0 | precise |
| #046-31 | EHA105 | AMP-ORI | precise | 12 <sup>b</sup> | 0 | precise |
| #046-32 | EHA105 | AMP-ORI | precise | 12 <sup>b</sup> | 0 | precise |
| #046-35 | EHA105 | AMP-ORI | precise | 12 <sup>b</sup> | 0 | precise |

---

|         |        |         |         |                 |         |         |
|---------|--------|---------|---------|-----------------|---------|---------|
| #046-36 | EHA105 | AMP-ORI | precise | 12 <sup>b</sup> | 0       | precise |
| #046-37 | EHA105 | AMP-ORI | -291    | 0               | 3 (GTC) | -15     |
| #046-42 | EHA105 | AMP-ORI | precise | 12 <sup>b</sup> | 0       | precise |
| #046-43 | EHA105 | AMP-ORI | precise | 12 <sup>b</sup> | 0       | precise |
| #046-44 | EHA105 | AMP-ORI | precise | 12 <sup>b</sup> | 0       | precise |
| #046-45 | EHA105 | AMP-ORI | precise | 12 <sup>b</sup> | 0       | precise |
| #046-46 | EHA105 | AMP-ORI | precise | 12 <sup>b</sup> | 0       | precise |
| #046-47 | EHA105 | AMP-ORI | precise | 12 <sup>b</sup> | 0       | precise |
| #046-48 | EHA105 | AMP-ORI | precise | 12 <sup>b</sup> | 0       | precise |
| #046-49 | EHA105 | AMP-ORI | precise | 12 <sup>b</sup> | 0       | precise |
| #047-1  | EHA105 | AMP-ORI | precise | 12 <sup>b</sup> | 0       | precise |
| #047-2  | EHA105 | AMP-ORI | precise | 12 <sup>b</sup> | 0       | precise |
| #047-4  | EHA105 | AMP-ORI | precise | 12 <sup>b</sup> | 0       | precise |
| #047-5  | EHA105 | AMP-ORI | precise | 12 <sup>b</sup> | 0       | precise |
| #047-6  | EHA105 | AMP-ORI | precise | 12 <sup>b</sup> | 0       | precise |
| #047-7  | EHA105 | AMP-ORI | precise | 12 <sup>b</sup> | 0       | precise |
| #047-8  | EHA105 | AMP-ORI | precise | 0               | 0       | -581    |
| #047-11 | EHA105 | AMP-ORI | precise | 12 <sup>b</sup> | 0       | precise |
| #047-13 | EHA105 | AMP-ORI | precise | 12 <sup>b</sup> | 0       | precise |
| #047-14 | EHA105 | AMP-ORI | precise | 12 <sup>b</sup> | 0       | precise |
| #047-15 | EHA105 | AMP-ORI | precise | 12 <sup>b</sup> | 0       | precise |
| #047-16 | EHA105 | AMP-ORI | precise | 12 <sup>b</sup> | 0       | precise |
| #047-17 | EHA105 | AMP-ORI | precise | 12 <sup>b</sup> | 0       | precise |
| #047-18 | EHA105 | AMP-ORI | precise | 12 <sup>b</sup> | 0       | precise |
| #047-19 | EHA105 | AMP-ORI | precise | 12 <sup>b</sup> | 0       | precise |
| #047-20 | EHA105 | AMP-ORI | precise | 12 <sup>b</sup> | 0       | precise |
| #047-21 | EHA105 | AMP-ORI | precise | 12 <sup>b</sup> | 0       | precise |
| #047-22 | EHA105 | AMP-ORI | precise | 12 <sup>b</sup> | 0       | precise |
| #047-23 | EHA105 | AMP-ORI | precise | 12 <sup>b</sup> | 0       | precise |
| #041-1  | EHA105 | AMP-ORI | precise | 12 <sup>b</sup> | 0       | precise |
| #041-2  | EHA105 | AMP-ORI | precise | 12 <sup>b</sup> | 0       | precise |
| #041-3  | EHA105 | AMP-ORI | precise | 12 <sup>b</sup> | 0       | precise |
| #041-5  | EHA105 | AMP-ORI | precise | 12 <sup>b</sup> | 0       | precise |
| #041-8  | EHA105 | AMP-ORI | precise | 12 <sup>b</sup> | 0       | precise |
| #041-9  | EHA105 | AMP-ORI | precise | 12 <sup>b</sup> | 0       | precise |
| #041-10 | EHA105 | AMP-ORI | precise | 12 <sup>b</sup> | 0       | precise |



Col-0

|         |        |         |         |                 |   |         |
|---------|--------|---------|---------|-----------------|---|---------|
| #021-1  | EHA105 | AMP-ORI | precise | 12 <sup>b</sup> | 0 | precise |
| #021-2  | EHA105 | AMP-ORI | precise | 12 <sup>b</sup> | 0 | precise |
| #021-5  | EHA105 | AMP-ORI | precise | 12 <sup>b</sup> | 0 | precise |
| #021-7  | EHA105 | AMP-ORI | precise | 12 <sup>b</sup> | 0 | precise |
| #021-8  | EHA105 | AMP-ORI | precise | 12 <sup>b</sup> | 0 | precise |
| #021-9  | EHA105 | AMP-ORI | precise | 12 <sup>b</sup> | 0 | precise |
| #021-10 | EHA105 | AMP-ORI | precise | 12 <sup>b</sup> | 0 | precise |
| #021-11 | EHA105 | AMP-ORI | precise | 12 <sup>b</sup> | 0 | precise |
| #021-12 | EHA105 | AMP-ORI | precise | 12 <sup>b</sup> | 0 | precise |
| #021-13 | EHA105 | AMP-ORI | precise | 12 <sup>b</sup> | 0 | precise |

---

<sup>a</sup>Right border (RB) and left border (LB) numerical values represent the position in DNA relative to precise end; <sup>b</sup>Microhomology of 12 bp nucleotides is true only if there were a readthrough of a RB sequence. Alternately, a precise LB and precise LB were joined without microhomology.

Supplemental Table 4. Sequenced T-DNA junctions from heterodimeric KAN-ORI and TET-ORI T-circles

| Sample No. | Constructs          | RB-RB junction |               |            |              | LB-LB junction |               |                     |              |
|------------|---------------------|----------------|---------------|------------|--------------|----------------|---------------|---------------------|--------------|
|            |                     | RB (TET-ORI)   | Microhomology | Filler DNA | RB (KAN-ORI) | LB (TET-ORI)   | Microhomology | Filler DNA          | LB (KAN-ORI) |
| #3         | KAN-ORI and TET-ORI | -1             | 2 (CA)        | 0          | precise      | -105           | 0             | 1 (A)               | -86          |
| #4         | KAN-ORI and TET-ORI | -231           | 2 (GA)        | 0          | precise      | -82            | 6 (TTCGGC)    | 0                   | -212         |
| #5         | KAN-ORI and TET-ORI | precise        | 0             | 0          | precise      | -98            | 3 (CAT)       | 0                   | -117         |
| #6         | KAN-ORI and TET-ORI | precise        | 1 (T)         |            | -2           | -81            | 2 (CG)        | 0                   | -29          |
| #9         | KAN-ORI and TET-ORI | precise        | 0             | 0          | precise      | -77            | 4 (TTAA)      | 0                   | -77          |
| #10        | KAN-ORI and TET-ORI | precise +2     | 2 (CA)        | 0          | -1           | -47            | 4 (ACAC)      | 0                   | -14          |
| #11        | KAN-ORI and TET-ORI | precise        | 0             | 3 (ATA)    | precise      | -66            | 5 (AATGT)     | 0                   | -49          |
| #15        | KAN-ORI and TET-ORI | precise        | 0             | 0          | precise      | -41            | 4 (TTAA)      | 0                   | -41          |
| #16        | KAN-ORI and TET-ORI | precise        | 0             | 0          | precise      | -83            | 1(T)          | 9 bp T-DNA sequence | -20          |
| #18        | KAN-ORI and TET-ORI | -12            | 1 (A)         | 0          | precise      | NA             | NA            | NA                  | NA           |
| #22        | KAN-ORI and TET-ORI | precise        | 0             | 0          | precise      | -100           | 4 (TGTT)      | 0                   | -46          |
| #24        | KAN-ORI and TET-ORI | precise +2     | 2 (CA)        | 0          | -1           | -100           | 4 (AACA)      | 0                   | -1018        |
| #25        | KAN-ORI and TET-ORI | precise +2     | 2 (CA)        | 0          | -1           | -25            | 1 (T)         | 0                   | -86          |
| #30        | KAN-ORI and TET-ORI | precise        | 0             | 0          | precise      | NA             | NA            | NA                  | NA           |
| #32        | KAN-ORI and TET-ORI | precise        | 0             | 0          | precise      | -26            | 2 (TG)        | 0                   | -264         |
| #37        | KAN-ORI and TET-ORI | precise        | 0             | 0          | -2           | -78            | 4 (GTTA)      | 0                   | -1061        |

  

| Sample No. | Constructs          | RB-LB junction |               |            |              | LB-RB junction |               |            |              |
|------------|---------------------|----------------|---------------|------------|--------------|----------------|---------------|------------|--------------|
|            |                     | LB (TET-ORI)   | Microhomology | Filler DNA | RB (KAN-ORI) | RB (TET-ORI)   | Microhomology | Filler DNA | LB (KAN-ORI) |
| #17        | KAN-ORI and TET-ORI | precise        | 12**          | 0          | precise      | precise        | 12**          | 0          | precise      |

  

| Sample No. | Constructs          | LB-RB junction |               |            |              | RB-RB junction |               |            |              |
|------------|---------------------|----------------|---------------|------------|--------------|----------------|---------------|------------|--------------|
|            |                     | LB (TET-ORI)   | Microhomology | Filler DNA | RB (KAN-ORI) | RB (TET-ORI)   | Microhomology | Filler DNA | RB (KAN-ORI) |
| #12*       | KAN-ORI and TET-ORI | precise        | 12**          | 0          | precise      | precise        | 0             | 1 (A)      | precise      |

\*The third junction (between two T-DNA LB sides) in T-circle #12 was not sequenced; \*\*12 bp can be a readthrough sequence of RB involved in microhomology with LB, or a precise RB joined to a precise LB end (i.e., no readthrough and microhomology)

Supplemental Table 5. Characterization of T-circles isolated from *Nicotiana benthamiana* using the T-DNA binary vector pE4636

| T-circle ID | Sequencing Method | RB status       | LB status        | Microhomology at RB                         | Microhomology at LB | Filler DNA                         | Major rearrangements                                                                                          | Size (bp) <sup>a,b</sup> |
|-------------|-------------------|-----------------|------------------|---------------------------------------------|---------------------|------------------------------------|---------------------------------------------------------------------------------------------------------------|--------------------------|
| M-1         | Sanger            | Precise         | 23 bp deletion   | 3 bp, but not directly at the border (TTGx) | 3 bp (AAT)          | 303 bp from <i>N. benthamiana</i>  | None                                                                                                          | 7814                     |
| K-10        | Wide-Seq          | 327 bp deletion | 4943 bp deletion | 5 bp (GCGCC)                                | None                | None                               | None                                                                                                          | 2241                     |
| J-1         | Wide-Seq          | Precise         | 89 bp deletion   | None                                        | None                | None                               | None                                                                                                          | 6364                     |
| J-5         | Wide-Seq          | 1 bp deletion   | 2072 bp deletion | None                                        | None                | 1506 from pAtC58                   | None                                                                                                          | 6606                     |
| JYWT6       | Sanger            | Precise         | ?                | None                                        | None                | None                               | From 97 to 1052 matched with expected T- circle 3720-2764 in reverse complement orientation                   | ~ 7000                   |
| JYWT7       | Sanger            | Precise         | 484 bp deletion  | None                                        | None                | 736 bp from pAtC58                 | None                                                                                                          | 7674                     |
| JYWT8       | Sanger            | 1 bp deletion   | 4352 bp deletion | 2 bp                                        | None                | None                               | None                                                                                                          | ~3000                    |
| JYWT9       | Sanger            | 7 bp deletion   | 4554 bp deletion | None                                        | None                | None                               | None                                                                                                          | ~3000                    |
| JYWT11      | Sanger            | 1 bp deletion   | 4981 bp deletion | None                                        | None                | None                               | None                                                                                                          | ~2500                    |
| JY4         | Sanger            | Precise         | ?                | None                                        | None                | 801 bp from pE4636                 | Sequence ends with 801 bp from pE4636; needs Wide-Seq analysis                                                | ~12,000                  |
| JY6         | Sanger            | Precise         | 5972 bp deletion | None                                        | None                | None                               | The <i>bla</i> gene promoter and much of the <i>bla</i> gene are deleted, but there must be another full copy | ~4000                    |
| 4           | Sanger            | 22 bp deletion  | None             | None                                        | None                | None                               | Inverted fragment insertion                                                                                   | ~7500                    |
| 10          | WideSeq           | 327 bp deletion | 4944 bp deletion | None                                        | None                | None                               | None                                                                                                          | 2241                     |
| 4-3         | Sanger            | Precise         | 74 bp deletion   | None                                        | None                | None                               | None                                                                                                          | 7437                     |
| 4-10        | Sanger            | Precise         | 361 bp deletion  | None                                        | None                | 1 bp (T)                           | None                                                                                                          | 7151                     |
| 4-7         | Sanger            | 4 bp deletion   | 4610 bp deletion | None                                        | None                | None                               | None                                                                                                          | 2897                     |
| 4-8         | Sanger            | 83 bp deletion  | 3831 bp deletion | None                                        | None                | None                               | None                                                                                                          | 3622                     |
| 4-12        | Wide-Seq          | 456 bp deletion | 4790 bp deletion | None                                        | None                | 2667 bp from <i>N. benthamiana</i> | None                                                                                                          | 4932                     |
| 4-14        | Wide-Seq          | 458 bp deletion | 4495 bp deletion | 1 bp (T)                                    | 4 bp (ATCT)         | None                               | 1548 bp region from <i>Venus-intron</i> gene in inverted orientation                                          | 4106                     |
| 4-23        | Wide-Seq          | 362 bp deletion | 4959 bp deletion | None                                        | 1 (T)               | None                               | 1328 bp from the <i>hptII</i> gene in inverted orientation                                                    | 3520                     |

|         |          |                 |                  |                          |              |                                                                  |                                          |      |
|---------|----------|-----------------|------------------|--------------------------|--------------|------------------------------------------------------------------|------------------------------------------|------|
| 4-20    | Sanger   | Precise         | 4816 bp deletion | None                     | None         | None                                                             | None                                     | 2695 |
| 5-1     | Sanger   | 3 bp deletion   | 4852 bp deletion | None                     | None         | None                                                             | None                                     | 2656 |
| 5-2     | Sanger   | Precise         | 4801 bp deletion | None                     | None         | None                                                             | None                                     | 2710 |
| 5-5     | Sanger   | Precise         | 88 bp deletion   | 2 bp (GA)                | None         | None                                                             | None                                     | 7424 |
| 6-2     | Wide-Seq | Precise         | 4521 bp deletion | None                     | 2 bp (TC)    | 1287 bp from the <i>hptIII</i> gene, with part of the terminator | Inverted fragment insertion              | 4271 |
| 6-5     | Sanger   | Precise         | 5203 bp deletion | None                     | None         | None                                                             | None                                     | 2308 |
| 6-6     | WideSeq  | Precise         | 4753 bp deletion | 2 bp (GA)                | None         | 3698 bp fragment from Venus cassette                             | inverted fragment insertion              | 6457 |
| 6-7     | Sanger   | Precise         | 5162 bp deletion | None                     | None         | None                                                             | None                                     | 2349 |
| 6-8     | WideSeq  | Precise         | 4553 bp deletion | None                     | 5 bp (AATGA) | 1177 bp insertion (35S terminator)                               | Inverted fragment insertion              | 4263 |
| 6-9     | Sanger   | 2 bp deletion   | 4291 bp deletion | None                     | None         | 2 bp (TG)                                                        | None                                     | 3220 |
| 6-15    | Sanger   | Precise         | 4622 bp deletion | 2 bp (GA)                | None         | 1 bp (T)                                                         | None                                     | 2890 |
| 6-19    | Sanger   | 12 bp deletion  | 512 bp deletion  | TTC vs. TTT              | None         | None                                                             | None                                     | 6978 |
| 6-24    | Sanger   | 8 bp deletion   | 5326 bp deletion | None                     | None         | 1 bp (A) at the RB junction and 2 bp (AA) at the LB junction     | Inverted fragment insertion              | 2889 |
| 6-28    | Sanger   | Precise         | 4842 bp deletion | None                     | 2 bp (AA)    | None                                                             | Inverted fragment insertion              | 2879 |
| 6-36    | Sanger   | Precise         | 220 bp deletion  | None                     | None         | None                                                             | None                                     | 7291 |
| 6-38    | Sanger   | 322 bp deletion | 4948 bp deletion | 5 bp (GCGCC)             | None         | None                                                             | None                                     | 2241 |
| 6-39    | Wide-Seq | Precise         | 4698 bp deletion | None                     | None         | 554 bp from pAtC58                                               | Inverted fragment insertion              | 3368 |
| 6-41-21 | Wide-Seq | 1 bp deletion   | 2183 bp deletion | 1 bp (G)                 | None         | None                                                             | Inverted fragment from the binary vector | 5964 |
| 6-42    | Sanger   | Precise         | 4222 bp deletion | 1 bp (A)                 | None         | None                                                             | None                                     | 3291 |
| 6-43-27 | Sanger   | 18 bp deletion  | 4979 bp deletion | None                     | None         | None                                                             | Inverted fragment (44 bp) insertion      | 2559 |
| 6-44    | Sanger   | 138 bp deletion | 446 bp deletion  | 4 bp (ATAA)              | None         | None                                                             | None                                     | 6927 |
| 6-51    | Sanger   | Precise         | 4990 bp deletion | 2 out of 3 (TGA vs. TGC) | 2 bp (AC)    | None                                                             | Inverted fragment (290 bp) insertion     | 2811 |

<sup>a</sup>Sanger sequencing sizes are estimates based on the deletion sizes at the RB and LB

<sup>b</sup>Approximate sizes are based on restriction endonuclease fragment sizes

Supplemental Table 6. Sequenced T-DNA junctions of monomeric T-circles from *Arabidopsis ku80/efr-1* mutants

| Sample No. | Strain | Construct | RB <sup>a</sup> | Microhomology   | Filler DNA | LB <sup>a</sup> |
|------------|--------|-----------|-----------------|-----------------|------------|-----------------|
| #043-1     | EHA105 | AMP-ORI   | Precise+2       | 4 (GACA)        | 0          | -35             |
| #043-2     | EHA105 | AMP-ORI   | precise         | 12 <sup>b</sup> | 0          | precise         |
| #043-3     | EHA105 | AMP-ORI   | precise         | 12 <sup>b</sup> | 0          | precise         |
| #043-4     | EHA105 | AMP-ORI   | precise         | 12 <sup>b</sup> | 0          | precise         |
| #043-5     | EHA105 | AMP-ORI   | precise         | 12 <sup>b</sup> | 0          | precise         |
| #043-6     | EHA105 | AMP-ORI   | precise         | 12 <sup>b</sup> | 0          | precise         |
| #043-7     | EHA105 | AMP-ORI   | precise         | 12 <sup>b</sup> | 0          | precise         |
| #043-8     | EHA105 | AMP-ORI   | precise         | 12 <sup>b</sup> | 0          | precise         |
| #043-9     | EHA105 | AMP-ORI   | precise         | 12 <sup>b</sup> | 0          | precise         |
| #043-10    | EHA105 | AMP-ORI   | precise         | 12 <sup>b</sup> | 0          | precise         |
| #043-11    | EHA105 | AMP-ORI   | precise         | 12 <sup>b</sup> | 0          | precise         |
| #043-12    | EHA105 | AMP-ORI   | precise         | 12 <sup>b</sup> | 0          | precise         |
| #043-15    | EHA105 | AMP-ORI   | precise         | 12 <sup>b</sup> | 0          | precise         |
| #043-16    | EHA105 | AMP-ORI   | precise         | 12 <sup>b</sup> | 0          | precise         |
| #043-17    | EHA105 | AMP-ORI   | precise         | 12 <sup>b</sup> | 0          | precise         |
| #043-18    | EHA105 | AMP-ORI   | precise         | 12 <sup>b</sup> | 0          | precise         |
| #043-19    | EHA105 | AMP-ORI   | precise         | 12 <sup>b</sup> | 0          | precise         |
| #043-20    | EHA105 | AMP-ORI   | -294            | 1 (C)           | 0          | -59             |
| #043-21    | EHA105 | AMP-ORI   | precise         | 12 <sup>b</sup> | 0          | precise         |
| #043-22    | EHA105 | AMP-ORI   | precise         | 12 <sup>b</sup> | 0          | precise         |
| #043-23    | EHA105 | AMP-ORI   | precise         | 12 <sup>b</sup> | 0          | precise         |
| #043-24    | EHA105 | AMP-ORI   | precise         | 12 <sup>b</sup> | 0          | precise         |
| #043-26    | EHA105 | AMP-ORI   | precise         | 12 <sup>b</sup> | 0          | precise         |
| #043-27    | EHA105 | AMP-ORI   | precise         | 12 <sup>b</sup> | 0          | precise         |
| #043-28    | EHA105 | AMP-ORI   | precise         | 12 <sup>b</sup> | 0          | precise         |
| #043-29    | EHA105 | AMP-ORI   | precise         | 12 <sup>b</sup> | 0          | precise         |
| #043-31    | EHA105 | AMP-ORI   | precise         | 12 <sup>b</sup> | 0          | precise         |
| #043-32    | EHA105 | AMP-ORI   | precise         | 12 <sup>b</sup> | 0          | precise         |
| #043-33    | EHA105 | AMP-ORI   | precise         | 12 <sup>b</sup> | 0          | precise         |
| #043-34    | EHA105 | AMP-ORI   | precise         | 12 <sup>b</sup> | 0          | precise         |
| #043-35    | EHA105 | AMP-ORI   | precise         | 12 <sup>b</sup> | 0          | precise         |
| #043-38    | EHA105 | AMP-ORI   | precise         | 12 <sup>b</sup> | 0          | precise         |
| #043-39    | EHA105 | AMP-ORI   | precise         | 12 <sup>b</sup> | 0          | precise         |
| #043-40    | EHA105 | AMP-ORI   | precise         | 12 <sup>b</sup> | 0          | precise         |
| #043-43    | EHA105 | AMP-ORI   | precise         | 12 <sup>b</sup> | 0          | precise         |
| #043-44    | EHA105 | AMP-ORI   | precise         | 12 <sup>b</sup> | 0          | precise         |
| #043-45    | EHA105 | AMP-ORI   | precise         | 12 <sup>b</sup> | 0          | precise         |
| #043-46    | EHA105 | AMP-ORI   | precise         | 12 <sup>b</sup> | 0          | precise         |
| #043-47    | EHA105 | AMP-ORI   | precise         | 12 <sup>b</sup> | 0          | precise         |
| #045-1     | EHA105 | AMP-ORI   | precise         | 12 <sup>b</sup> | 0          | precise         |
| #045-2     | EHA105 | AMP-ORI   | precise         | 12 <sup>b</sup> | 0          | precise         |

|         |        |         |         |                 |   |         |
|---------|--------|---------|---------|-----------------|---|---------|
| #045-3  | EHA105 | AMP-ORI | precise | 12 <sup>b</sup> | 0 | precise |
| #045-4  | EHA105 | AMP-ORI | precise | 12 <sup>b</sup> | 0 | precise |
| #045-5  | EHA105 | AMP-ORI | precise | 12 <sup>b</sup> | 0 | precise |
| #045-6  | EHA105 | AMP-ORI | precise | 12 <sup>b</sup> | 0 | precise |
| #045-8  | EHA105 | AMP-ORI | precise | 12 <sup>b</sup> | 0 | precise |
| #045-9  | EHA105 | AMP-ORI | precise | 12 <sup>b</sup> | 0 | precise |
| #045-10 | EHA105 | AMP-ORI | precise | 12 <sup>b</sup> | 0 | precise |
| #045-11 | EHA105 | AMP-ORI | precise | 12 <sup>b</sup> | 0 | precise |
| #045-14 | EHA105 | AMP-ORI | precise | 12 <sup>b</sup> | 0 | precise |
| #045-15 | EHA105 | AMP-ORI | precise | 12 <sup>b</sup> | 0 | precise |
| #045-16 | EHA105 | AMP-ORI | precise | 12 <sup>b</sup> | 0 | precise |
| #045-17 | EHA105 | AMP-ORI | precise | 12 <sup>b</sup> | 0 | precise |
| #045-18 | EHA105 | AMP-ORI | precise | 12 <sup>b</sup> | 0 | precise |
| #045-20 | EHA105 | AMP-ORI | precise | 12 <sup>b</sup> | 0 | precise |
| #045-21 | EHA105 | AMP-ORI | precise | 12 <sup>b</sup> | 0 | precise |
| #045-22 | EHA105 | AMP-ORI | precise | 12 <sup>b</sup> | 0 | precise |
| #045-24 | EHA105 | AMP-ORI | precise | 12 <sup>b</sup> | 0 | precise |
| #045-25 | EHA105 | AMP-ORI | precise | 12 <sup>b</sup> | 0 | precise |
| #045-27 | EHA105 | AMP-ORI | precise | 12 <sup>b</sup> | 0 | precise |
| #045-28 | EHA105 | AMP-ORI | precise | 12 <sup>b</sup> | 0 | precise |
| #045-29 | EHA105 | AMP-ORI | precise | 12 <sup>b</sup> | 0 | precise |
| #045-30 | EHA105 | AMP-ORI | precise | 12 <sup>b</sup> | 0 | precise |

<sup>a</sup>Right border (RB) and left border (LB) numerical values represent the position in DNA relative to a precise end.

<sup>b</sup>Microhomology of 12 bp nucleotides is true only if there were a readthrough of a RB sequence. Alternately, precise RBs and precise LBs were joined without microhomology.

Supplemental Table 7. Bacterial strains used in this study

| Strains & plasmids            | Description/Use                                                                                                                                                                                                                            | Antibiotic resistance <sup>1</sup> | Reference                   |
|-------------------------------|--------------------------------------------------------------------------------------------------------------------------------------------------------------------------------------------------------------------------------------------|------------------------------------|-----------------------------|
| <b><i>E. coli:</i></b>        |                                                                                                                                                                                                                                            |                                    |                             |
| DH10B                         | F- <i>mcrA</i> Δ( <i>mrr-hsdRMS-mcrBC</i> )<br>φ80 <i>lacZ</i> Δ <i>M15</i> Δ <i>lacX74</i> <i>recA1</i> <i>endA1</i><br><i>araD139</i> Δ ( <i>ara-leu</i> )7697 <i>galU</i> <i>galK</i> λ-<br><i>rpsL</i> (Str <sup>R</sup> ) <i>nupG</i> | None                               | Grant <i>et al.</i> , 1990  |
| E4                            | <i>E. coli</i> 2104 containing pPH1JI                                                                                                                                                                                                      | Gent                               | Hirsch and Beringer, 1984   |
| E1500                         | pUC18 with P <sub>virD</sub> - <i>VirD1</i> - <i>VirD2</i> ω mutation                                                                                                                                                                      | Amp                                | Gelvin lab stock            |
| E1727                         | pLAFR1 containing an <i>EcoRI</i> fragment containing a modified <i>picA</i> locus                                                                                                                                                         | Tet                                | Gelvin lab stock            |
| E1745                         | 5.5 kbp blunted <i>EcoRI</i> fragment of pE1500 cloned to the blunted <i>PstI</i> site of pE1727                                                                                                                                           | Amp, Tet                           | Gelvin lab stock            |
| E1961                         | 2.6 kbp <i>PstI</i> fragment containing the <i>sacRB</i> genes cloned into the <i>PstI</i> site of pBluescript KS-                                                                                                                         | Amp                                | Gelvin lab stock            |
| E3052                         | <i>EcoRI</i> - <i>SacII</i> fragment containing the <i>VirD2</i> gene cloned into the corresponding sites of pSAT6-nEYFP-C1                                                                                                                | Amp                                | Gelvin lab stock            |
| E3332                         | 7.2 kbp <i>XhoI</i> fragment containing the <i>VirD</i> operon cloned into the <i>XhoI</i> site of pBluescript KS+                                                                                                                         | Amp                                | Gelvin lab stock            |
| E3351                         | Klenow filled-in <i>Asp718</i> site of pBluescript KS+                                                                                                                                                                                     | Amp                                | Gelvin lab stock            |
| E3353                         | 3.27 kbp blunted <i>SphI</i> - <i>XhoI</i> fragment of pE3332 cloned into the <i>SmaI</i> - <i>XhoI</i> sites of pE3351                                                                                                                    | Amp                                | Gelvin lab stock            |
| E3355                         | <i>HindIII</i> fragment from pE3052 cloned into the <i>HindIII</i> site of pE3353                                                                                                                                                          | Amp                                | Gelvin lab stock            |
| E3356                         | <i>KpnI</i> deletion of pE3355 to create a non-polar deletion of <i>VirD2</i>                                                                                                                                                              | Amp                                | Gelvin lab stock            |
| E3358                         | <i>XhoI</i> - <i>NotI</i> fragment from pE3356 cloned into the corresponding sites of pJQ200sk                                                                                                                                             | Gent                               | Gelvin lab stock            |
| E4329                         | pPZP- <i>hpt</i> -Venus-intron binary vector                                                                                                                                                                                               | Spec                               | Gelvin lab stock            |
| E4579                         | pE4330 ligated to pUC19 at the <i>SalI</i> and <i>SacI</i> sites                                                                                                                                                                           | Amp, Spec                          | This study                  |
| E4636                         | T-circle binary vector                                                                                                                                                                                                                     | Spec                               | This study                  |
| E4252                         | pRCS11 (TET-ORI; KS101)                                                                                                                                                                                                                    | Tet, Spec                          | This study                  |
| E4253                         | pTET-ORI modified RB region; KS102                                                                                                                                                                                                         | Tet, Spec                          | This study                  |
| E4254                         | TT3369; pAMP-ORI T-circle binary vector                                                                                                                                                                                                    | Amp, Spec                          | Singer <i>et al.</i> , 2012 |
| E4255                         | TT4500; pKAN-ORI T-circle binary vector                                                                                                                                                                                                    | Kan, Spec                          | Singer <i>et al.</i> , 2012 |
| pEHC13                        | Cosmid clone of pTiBo542 <i>Vir</i> region                                                                                                                                                                                                 |                                    | Hood <i>et al.</i> , 1984   |
| pJQ200sk                      | <i>sacRB</i> plasmid                                                                                                                                                                                                                       | Gent                               | Quandt and Hines, 1993      |
| <b><i>A. tumefaciens:</i></b> |                                                                                                                                                                                                                                            |                                    |                             |
| A136                          | Strain C58 cured of the Ti-plasmid                                                                                                                                                                                                         | Rif                                | Watson <i>et al.</i> , 1975 |
| EHA105                        | Disarmed super-virulent strain                                                                                                                                                                                                             | Rif                                | Hood <i>et al.</i> , 1993   |
| At1132                        | pE1745 in A136                                                                                                                                                                                                                             | Carb, Rif, Tet                     | Gelvin lab stock            |
| At1136                        | Transconjugant from At1132 x E4                                                                                                                                                                                                            | Carb, Rif                          | Gelvin lab stock            |
| At1697                        | EHA105 with a non-polar <i>VirD2</i> deletion                                                                                                                                                                                              | Rif                                | This study                  |
| At1710                        | pTiBo542-Δ <i>VirD2</i> from At1697 with the <i>VirD2</i> ω substitution in At1136 + pPH1JI                                                                                                                                                | Carb, Gent, Rif, Spec              | Gelvin lab stock            |
| At1959                        | pTiBo542-Δ <i>VirD2</i> from At1697 with the <i>VirD2</i> ω substitution lacking pPH1JI                                                                                                                                                    | Carb, Rif                          | This study                  |
| At2120                        | EHA105(pBISN1, pKS102)                                                                                                                                                                                                                     | Kan, Rif, Spec                     | This study                  |
| At2121                        | At1959(pBISN1, pKS102)                                                                                                                                                                                                                     | Kan, Rif, Spec                     | This study                  |
| At2162                        | At1959(pBISN1, pRCS11)                                                                                                                                                                                                                     | Carb, Kan, Rif, Spec               | This study                  |
| At2168                        | pRCS11 in At1959                                                                                                                                                                                                                           | Carb, Spec                         | This study                  |

|        |                                         |                 |            |
|--------|-----------------------------------------|-----------------|------------|
| At2273 | pE4636 T-circle binary vector in EHA105 | Carb, Rif, Spec | This study |
| At2332 | pE4636 T-circle binary vector in A1959  | Carb, Rif, Spec | This study |

<sup>1</sup> Amp, ampicillin; Carb, carbenicillin; Gent, gentamicin; Kan, kanamycin; Rif, rifampicin; Spec, spectinomycin; Tet, tetracycline

## References

- Grant, S.G., Jessee, J., Bloom, F.R., and Hanahan, D.** (1990). Differential plasmid rescue from transgenic mouse DNAs into *Escherichia coli* methylation-restriction mutants. *Proc. Natl. Acad. Sci. USA* 87, 4645-4649.
- Hirsch, P.R., and Beringer, J.E.** (1984). A physical map of pPH1JI and pJB4JI. *Plasmid* 12, 139-41.
- Hood, E.E., Gelvin, S.B., Melchers, L.S. and Hoekema, A.** (1993). New *Agrobacterium* helper plasmids for gene transfer to plants. *Transgen. Res.* 2, 208-218.
- Hood, E., Jen, G., Kayes, L., Kramer, J., Fraley, R.T., and Chilton, M.-D.** (1984). Restriction endonuclease map of pTiBoS42, a potential Ti plasmid vector for genetic engineering of plants. *Bio/Technol.* 2, 702-708.
- Quandt, J., and Hynes, M.F.** (1993). Versatile suicide vectors which allow direct selection for gene replacement in Gram-negative bacteria. *Gene* 127, 15-21.
- Singer, K., Shibolet, Y.M., Li, J., and Tzfira, T.** (2012). Formation of complex extrachromosomal T-DNA structures in *Agrobacterium tumefaciens*-infected plants. *Plant Physiol.* 160, 511-522.
- Watson, B., Currier, T.C., Gordon, M.P., Chilton, M.-D., and Nester, E.W.** (1975). Plasmid required for virulence of *Agrobacterium tumefaciens*. *J. Bacteriol.* 123, 255-264.
